# Supplementary material
Source: publisher figshare collection journal article supplement (https://sage.figshare.com/ndownloader/files/12370409)
Supplement: Supplementary file 1 [file 12370409]

## **Appendix 1**

A superficial wound infection must meet the following numbered criteria: 1) the infection involves only the skin and the subcutaneous tissue of the incision and 2) the patient has a least one of the following lettered features: A) purulent drainage from the superficial portion of the incision, B) organisms isolated from an aseptically obtained culture of fluid or tissue from the superficial portion of the incision, C) at least one of the following numbered signs or symptoms: 1) pain or tenderness, 2) localized swelling, redness, or heat, and 3) the superficial portion of the incision is deliberately opened by the surgeon or by the attending physician.
